# Supplementary figures and images for: Full‐Scale Testing of Precast Concrete Bridge Using Internal Connector in Negative Moment Region
Source: Hindawi journal article supplement (doi:10.1155/2019/6309859), 2019-01-01

**Graphical abstracts**

**
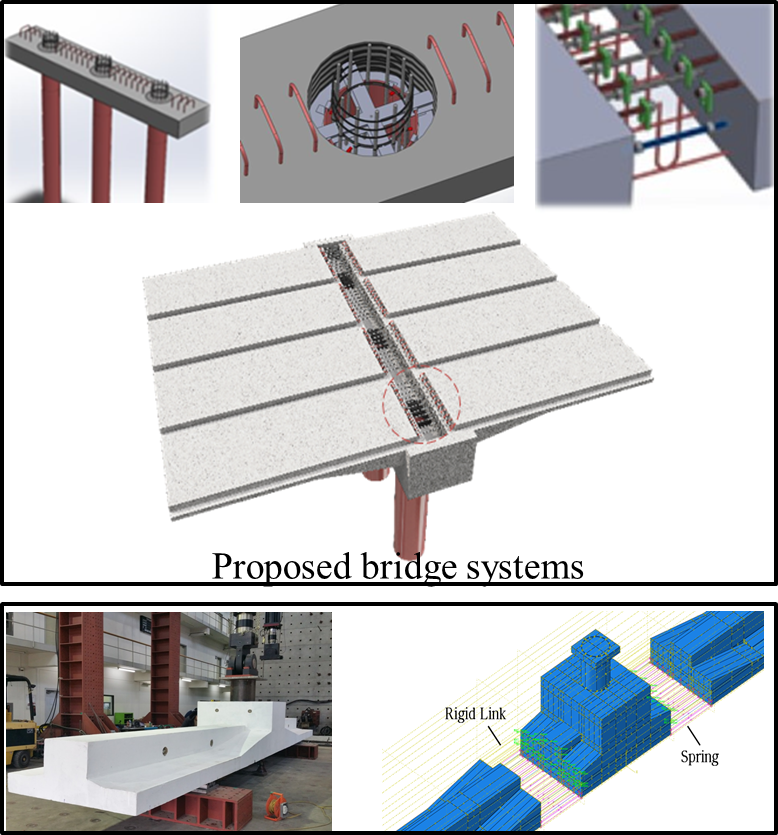
**

Supplement: f1 [file 6309859.f1.docx]
